# Supplementary material for: Position along the nasal/temporal plane affects synaptic development by adult photoreceptors, revealed by micropatterning
Source: Royal Society of Chemistry journal article supplement (doi:10.1039/c4ib00213j), 2015-01-01
Supplement: c4ib00213j1.pdf [file c4ib00213j1.pdf]

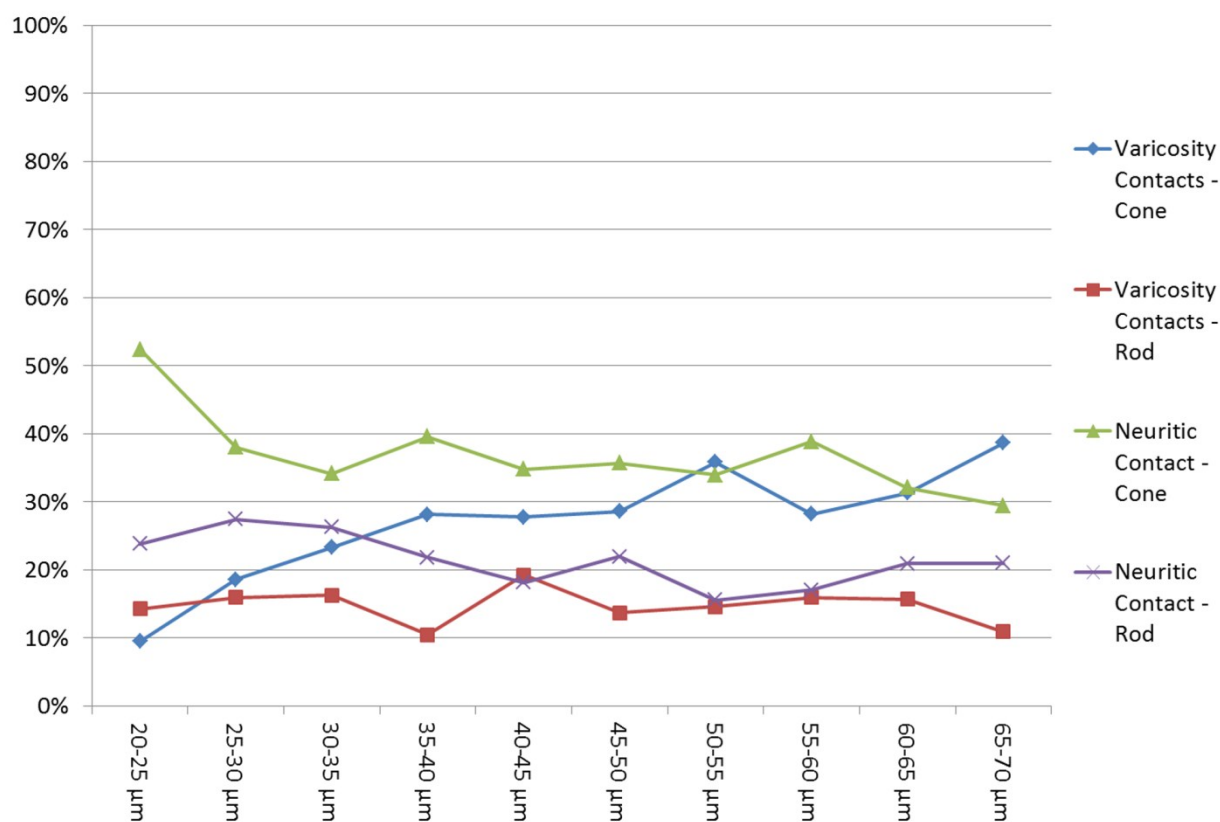

Supp. Fig. 1: Percentage of neuritic contacts (green and purple lines) and varicosity-containing neuritic contacts (blue and red lines) between rod or cone photoreceptor and target cell versus the distance between the photoreceptor and target cell.
